# Supplementary material for: An In Vitro Chicken Gut Model Demonstrates Transfer of a Multidrug Resistance Plasmid from Salmonella to Commensal Escherichia coli
Source: PubMed Central journal article supplement (PMC5516254; doi:10.1128/mbio.00777-17), 2017-07-18

Figure S1. a) Chao1 alpha diversity plots for experiment number, time-point, *Salmonella* inoculation, and cefotaxime administration. Significance of differences in Chao1 indices by each categorical variable are given.

### i) Experiment Number

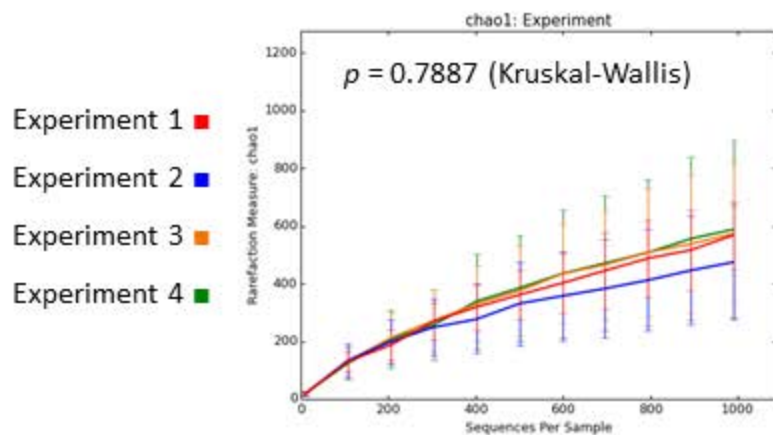

### ii) Time-point

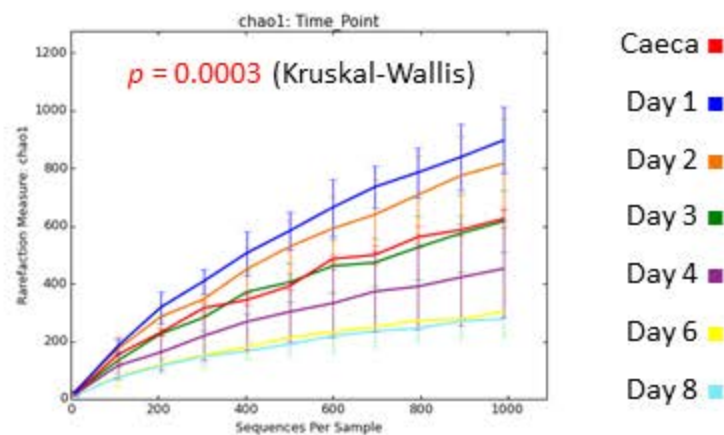

### iii) *Salmonella* Inoculation

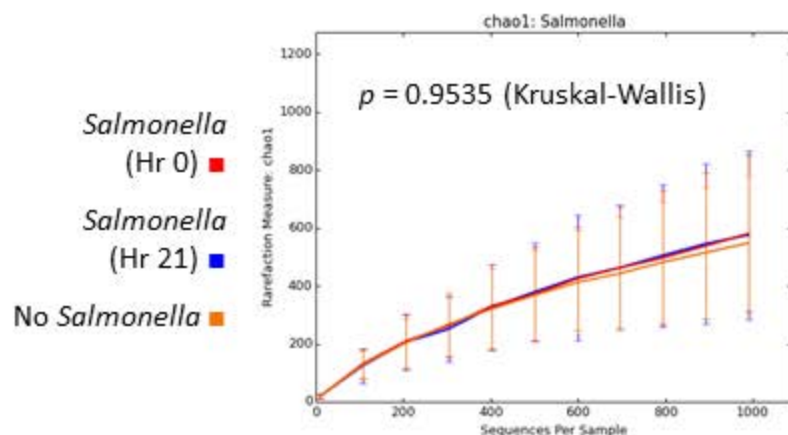

### iv) Cefotaxime treatment

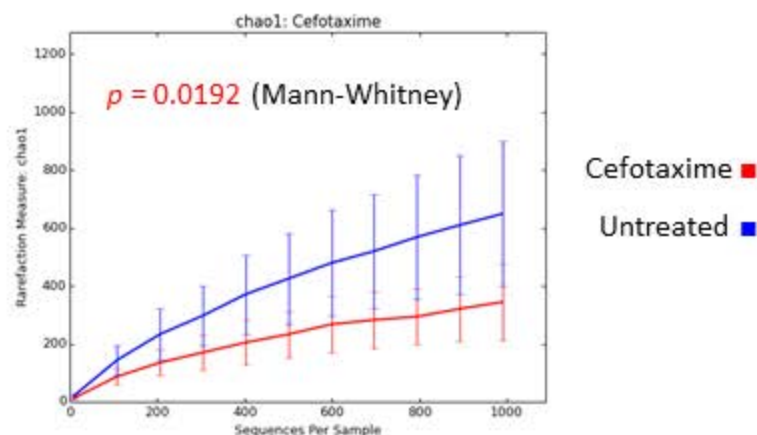

Figure S1 b) Shannon alpha diversity plots for experiment number, time-point, *Salmonella* inoculation, and cefotaxime administration. Significance of differences in Shannon indices by each categorical variable are given.

### i) Experiment Number

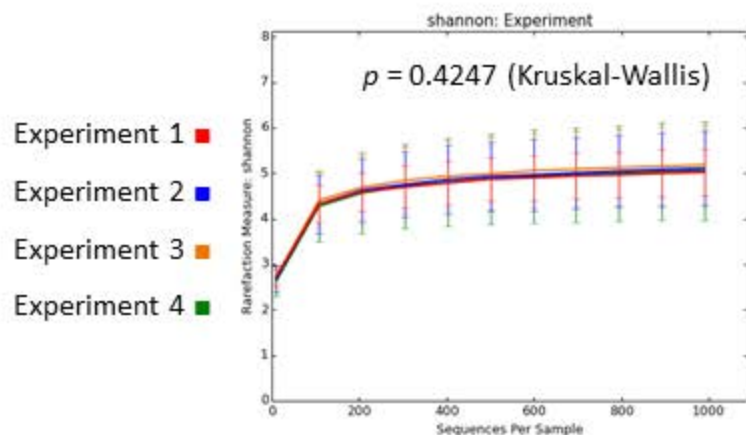

### ii) Time-point

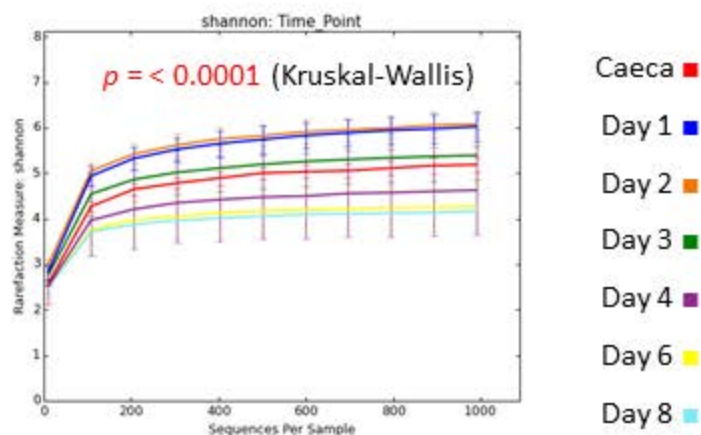

### iii) *Salmonella* Inoculation

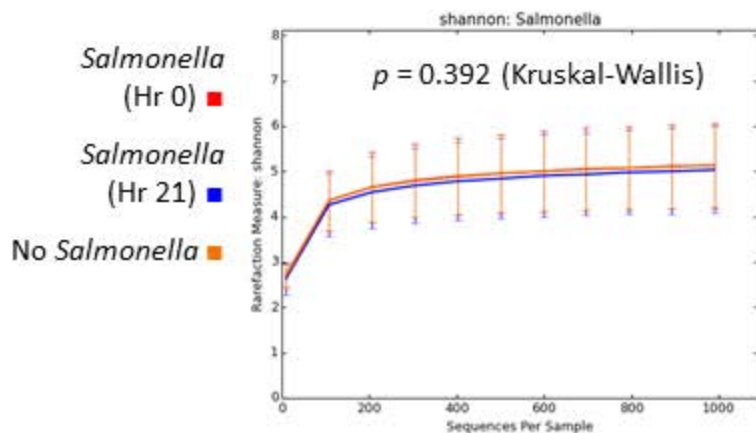

### iv) Cefotaxime treatment

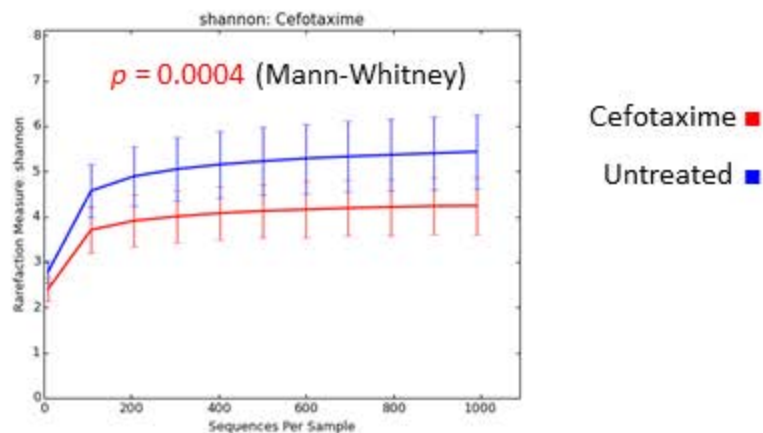

Supplement: mbo003173381sf1.pdf [file mbo003173381sf1.pdf]
